# Supplementary material for: Efficient and Sustainable Bidentate Amines-Functionalized Resins for Removing Ag+, Cu2+, Pb2+, and Fe3+ from Water
Source: MDPI journal article supplement (doi:10.3390/polym15132778), 2023-06-22
Supplement: s1 [file s1]

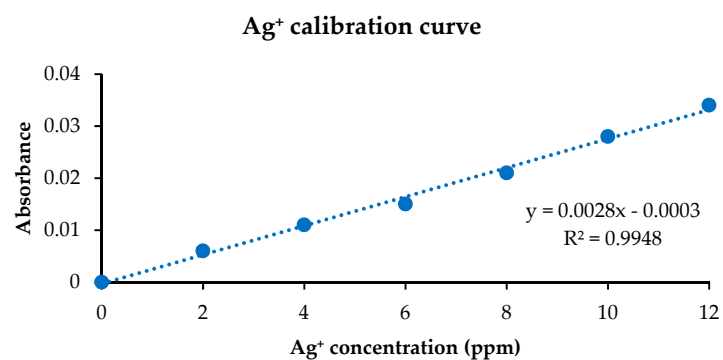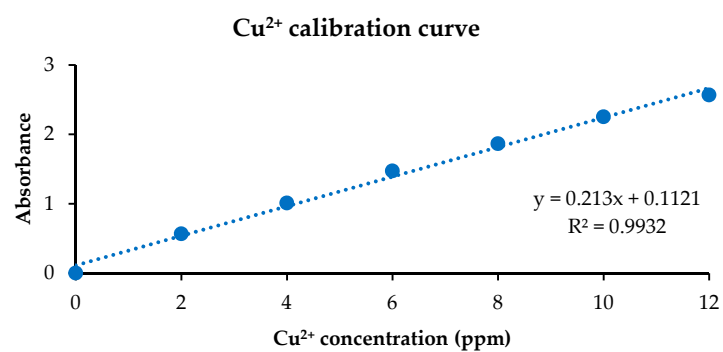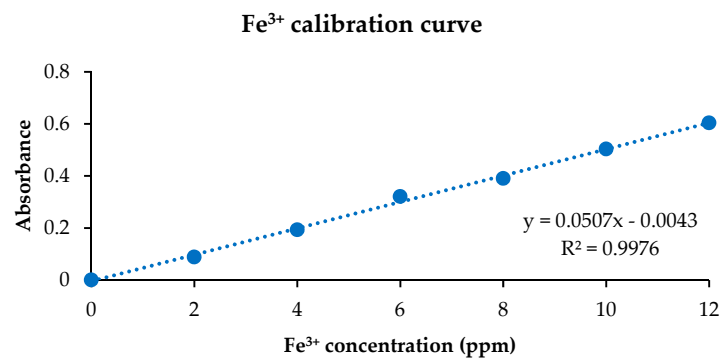

**Figure S1.** Calibration plots of Ag<sup>+</sup>, Cu<sup>2+</sup>, and Fe<sup>3+</sup> by UV-Vis at 281, 240, and 510 nm, respectively.

**Table S1.** Cation retention by chelating resins (flow procedure).

| MR-PDA-Ag <sup>+</sup><br>(A <sub>i</sub> =0.028, λ=382 nm; C <sub>i</sub> = 10 ppm) |                |                      |                |                      |
|--------------------------------------------------------------------------------------|----------------|----------------------|----------------|----------------------|
| pH                                                                                   | vel=10 mL/min  |                      | vel=5 mL/min   |                      |
|                                                                                      | A <sub>f</sub> | C <sub>f</sub> (ppm) | A <sub>f</sub> | C <sub>f</sub> (ppm) |
| 7                                                                                    | 0.004          | 1.535                | 0.002          | 0.821                |
| 6                                                                                    | 0.006          | 2.250                | 0.005          | 1.892                |
| 5                                                                                    | 0.015          | 5.464                | 0.028          | 10.000               |
| 4                                                                                    | 0.024          | 8.678                | 0.028          | 10.000               |

A<sub>i</sub>: initial absorbance; A<sub>f</sub>: final absorbance; C<sub>i</sub>: initial concentration; C<sub>f</sub>: final concentration

| MR-DPA-Cu <sup>2+</sup><br>(A <sub>i</sub> =2.253, λ=240 nm; C <sub>i</sub> = 10 ppm) |                |                      |                |                      |
|---------------------------------------------------------------------------------------|----------------|----------------------|----------------|----------------------|
| pH                                                                                    | vel=10 mL/min  |                      | vel=5 mL/min   |                      |
|                                                                                       | A <sub>f</sub> | C <sub>f</sub> (ppm) | A <sub>f</sub> | C <sub>f</sub> (ppm) |
| 5                                                                                     | 2.003          | 8.877                | 2.031          | 9.008                |
| 4                                                                                     | 2.253          | 10.000               | 2.253          | 10.000               |
| 3                                                                                     | 2.075          | 9.215                | 2.101          | 9.337                |
| 2                                                                                     | 2.197          | 9.780                | 2.218          | 9.886                |

A<sub>i</sub>: initial absorbance; A<sub>f</sub>: final absorbance; C<sub>i</sub>: initial concentration; C<sub>f</sub>: final concentration

| MR-AMP--Fe <sup>3+</sup><br>(A <sub>i</sub> =0.503, λ=510 nm; C <sub>i</sub> = 10 ppm) |                |                      |                |                      |
|----------------------------------------------------------------------------------------|----------------|----------------------|----------------|----------------------|
| pH                                                                                     | vel=10 mL/min  |                      | vel=5 mL/min   |                      |
|                                                                                        | A <sub>f</sub> | C <sub>f</sub> (ppm) | A <sub>f</sub> | C <sub>f</sub> (ppm) |
| 3                                                                                      | 0.481          | 9.402                | 0.449          | 8.940                |
| 2                                                                                      | 0.393          | 7.836                | 0.393          | 7.737                |

A<sub>i</sub>: initial absorbance; A<sub>f</sub>: final absorbance; C<sub>i</sub>: initial concentration; C<sub>f</sub>: final concentration

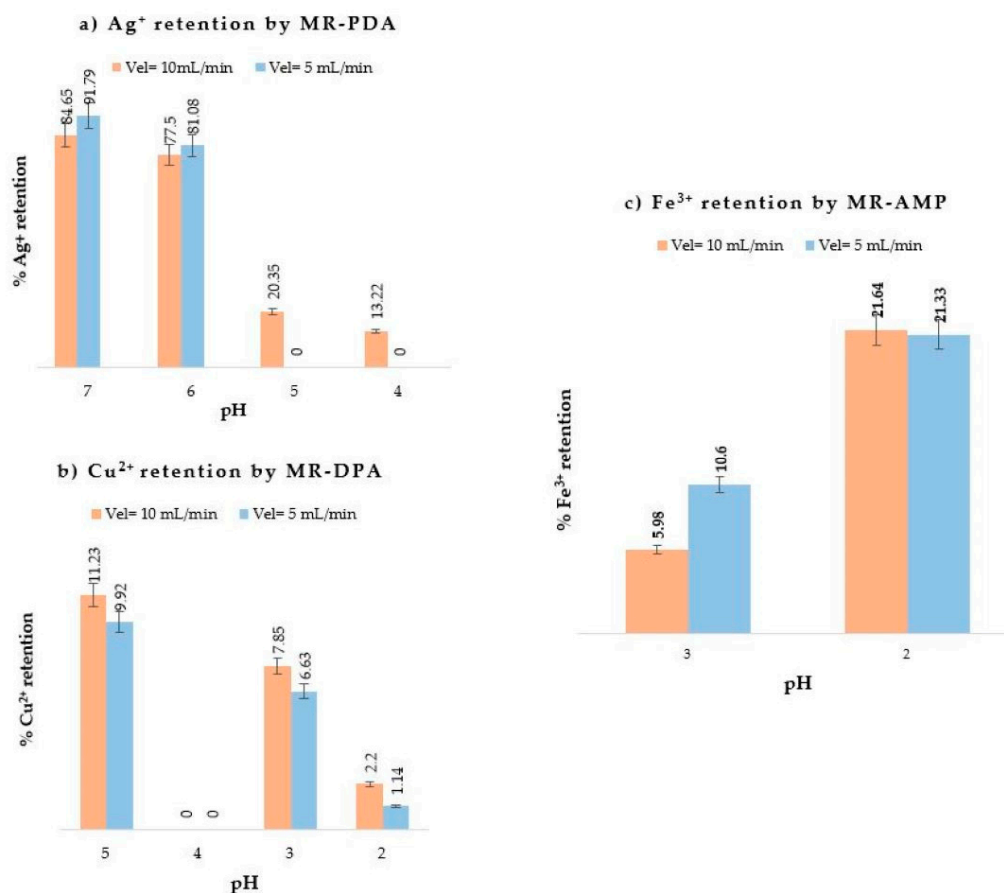

**Figure S2.** Determination of cation retention percentage of chelating resins by flow procedure. a) **MR-PDA- $\text{Ag}^+$** . b) **MR-DPA- $\text{Cu}^{2+}$** . c) **MR-AMP- $\text{Fe}^{3+}$** . At a flow rate of 10 mL/min, the blue bar displays data for a 10 ppm solution, while the orange bar represents the same concentration at a flow rate of 5 mL/min. The error bars have a 95% confidence level.

**Table S2.** Data on the reusability of chelating resins were obtained through analysis using the flow procedure.

| MR-PDA-Ag <sup>+</sup> ( $A_i=0.028$ , $\lambda=382$ nm; $C_i = 10$ ppm) |                |                      |       |                |                      |
|--------------------------------------------------------------------------|----------------|----------------------|-------|----------------|----------------------|
| vel=10 mL/min                                                            |                |                      |       |                |                      |
| Cycle                                                                    | A <sub>f</sub> | C <sub>f</sub> (ppm) | Cycle | A <sub>f</sub> | C <sub>f</sub> (ppm) |
| 1                                                                        | 0.003          | 1.178                | 6     | 0.003          | 1.178                |
| 2                                                                        | 0.018          | 6.535                | 7     | 0.008          | 2.964                |
| 3                                                                        | 0.006          | 2.250                | 8     | 0.006          | 2.250                |
| 4                                                                        | 0.012          | 4.392                | 9     | 0.005          | 1.892                |
| 5                                                                        | 0.004          | 1.535                | 10    | 0.004          | 1.535                |

A<sub>i</sub>: initial absorbance; A<sub>f</sub>: final absorbance; C<sub>i</sub>: initial concentration; C<sub>f</sub>: final concentration

| MR-DPA-Cu <sup>2+</sup> ( $A_i=2.253$ , $\lambda=240$ nm; $C_i = 10$ ppm) |                |                      |       |                |                      |
|---------------------------------------------------------------------------|----------------|----------------------|-------|----------------|----------------------|
| vel=10 mL/min                                                             |                |                      |       |                |                      |
| Cycle                                                                     | A <sub>f</sub> | C <sub>f</sub> (ppm) | Cycle | A <sub>f</sub> | C <sub>f</sub> (ppm) |
| 1                                                                         | 2.058          | 9.135                | 6     | 1.898          | 8.384                |
| 2                                                                         | 2.043          | 9.065                | 7     | 1.883          | 8.314                |
| 3                                                                         | 2.035          | 9.027                | 8     | 1.879          | 8.295                |
| 4                                                                         | 2.075          | 9.215                | 9     | 1.876          | 8.281                |
| 5                                                                         | 2.063          | 9.159                | 10    | 1.921          | 8.492                |

A<sub>i</sub>: initial absorbance; A<sub>f</sub>: final absorbance; C<sub>i</sub>: initial concentration; C<sub>f</sub>: final concentration

| MR-AMP-Fe <sup>3+</sup> ( $A_i=0.503$ , $\lambda=510$ nm; $C_i = 10$ ppm) |                |                      |       |                |                      |
|---------------------------------------------------------------------------|----------------|----------------------|-------|----------------|----------------------|
| vel=10 mL/min                                                             |                |                      |       |                |                      |
| Cycle                                                                     | A <sub>f</sub> | C <sub>f</sub> (ppm) | Cycle | A <sub>f</sub> | C <sub>f</sub> (ppm) |
| 1                                                                         | 0.148          | 3.003                | 6     | 0.317          | 6.337                |
| 2                                                                         | 0.092          | 1.899                | 7     | 0.328          | 6.554                |
| 3                                                                         | 0.160          | 3.240                | 8     | 0.309          | 6.179                |
| 4                                                                         | 0.305          | 6.100                | 9     | 0.315          | 6.297                |
| 5                                                                         | 0.332          | 6.633                | 10    | 0.321          | 6.416                |

A<sub>i</sub>: initial absorbance; A<sub>f</sub>: final absorbance; C<sub>i</sub>: initial concentration; C<sub>f</sub>: final concentration
